# Supplementary material for: The Relationships between Plant Developmental Traits and Winter Field Survival in Rye (Secale cereale L.)
Source: MDPI journal article supplement (doi:10.3390/plants10112455), 2021-11-13
Supplement: s1 [file s1]

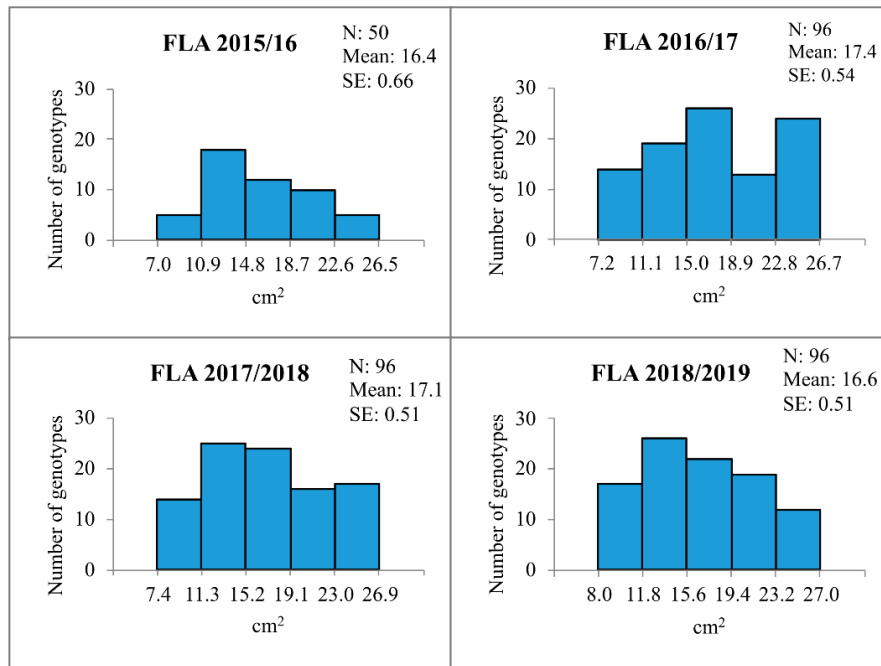

| Correlations between FLA values determined in different trials. |           |           |           |           |          |
|-----------------------------------------------------------------|-----------|-----------|-----------|-----------|----------|
| Trait trial                                                     | FLA 15/16 | FLA 16/17 | FLA 17/18 | FLA 18/19 | FLA BLUE |
| FLA_15/16                                                       | 1.00      |           |           |           |          |
| FLA_16/17                                                       | 0.61***   | 1.00      |           |           |          |
| FLA_17/18                                                       | 0.45**    | 0.90***   | 1.00      |           |          |
| FLA_18/19                                                       | 0.60***   | 0.88***   | 0.88***   | 1.00      |          |
| FLA BLUE                                                        | 0.62***   | 0.94***   | 0.93***   | 0.94***   | 1.00     |

Pearson correlation coefficient determined at \*\* $p < 0.01$ ; \*\*\* $p < 0.001$ .

**Figure S7.** Frequency distribution and correlation analysis for FLA data obtained for rye population in four field trials.
