# Supplementary material for: The Relationships between Plant Developmental Traits and Winter Field Survival in Rye (Secale cereale L.)
Source: MDPI journal article supplement (doi:10.3390/plants10112455), 2021-11-13
Supplement: s1 [file s1]

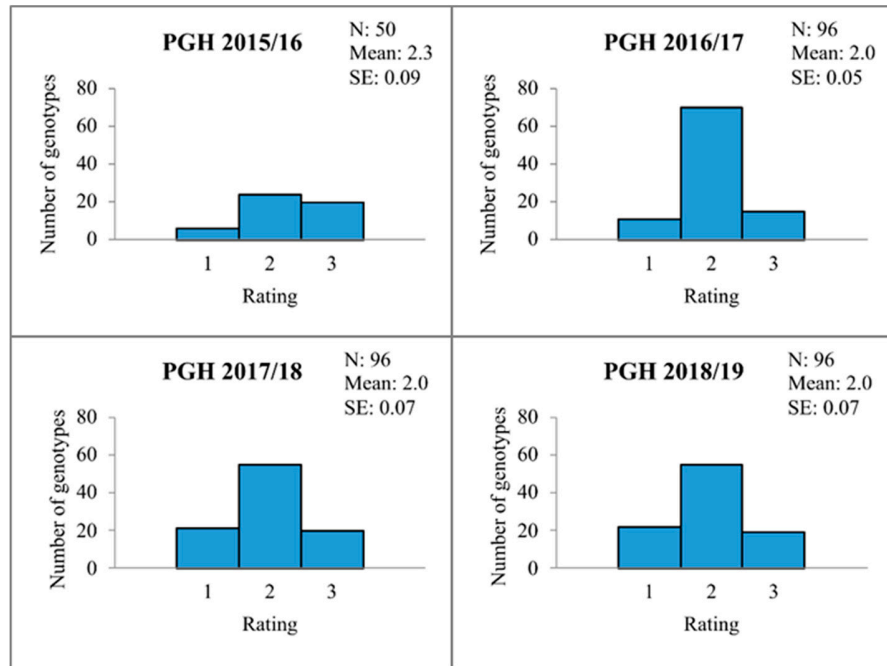

| Correlations between PGH values determined in different trials. |           |           |           |           |          |
|-----------------------------------------------------------------|-----------|-----------|-----------|-----------|----------|
| Trait trial                                                     | PGH 15/16 | PGH 16/17 | PGH 17/18 | PGH 18/19 | PGH BLUE |
| PGH_15/16                                                       | 1.00      |           |           |           |          |
| PGH_16/17                                                       | 0.56***   | 1.00      |           |           |          |
| PGH_17/18                                                       | 0.15      | 0.22*     | 1.00      |           |          |
| PGH_18/19                                                       | 0.50***   | 0.43***   | 0.68***   | 1.00      |          |
| PGH_BLUE                                                        | 0.74***   | 0.67***   | 0.76***   | 0.89***   | 1.00     |

Pearson correlation coefficient determined at \*  $p < 0.05$ , \*\*\*  $p < 0.001$ .

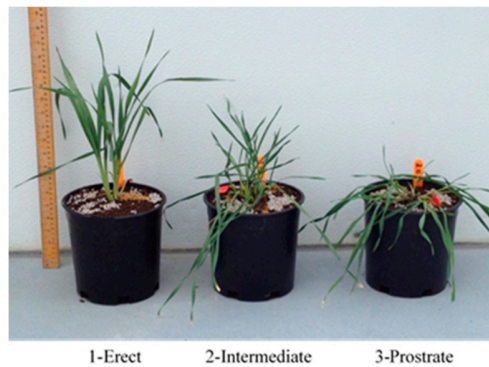

**Figure S3.** Frequency distribution and correlation analysis for PGH data obtained for rye population in four studies. Phenotypes scored for PGH is shown.
