# Supplementary material for: The Relationships between Plant Developmental Traits and Winter Field Survival in Rye (Secale cereale L.)
Source: MDPI journal article supplement (doi:10.3390/plants10112455), 2021-11-13
Supplement: s1 [file s1]

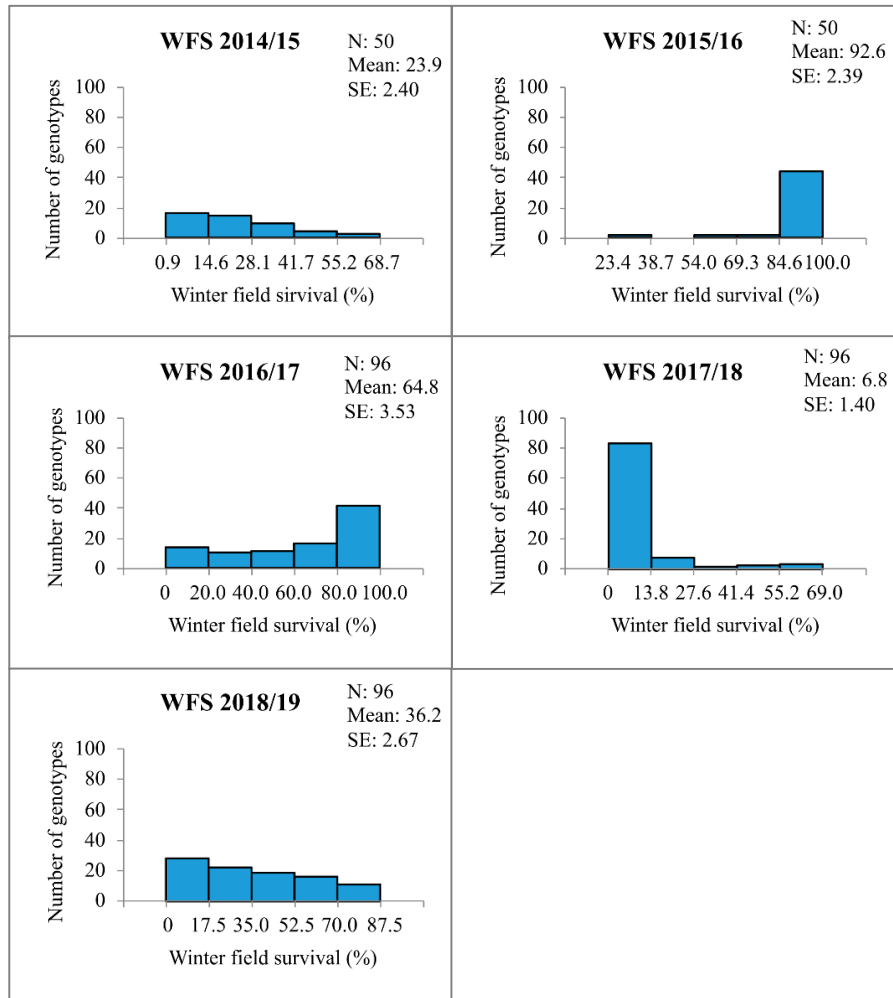

**Figure S1.** Frequency distribution for WFS data obtained for rye population in five field trials. Correlation analysis is presented in Table 2.
