# Supplementary material for: The Relationships between Plant Developmental Traits and Winter Field Survival in Rye (Secale cereale L.)
Source: MDPI journal article supplement (doi:10.3390/plants10112455), 2021-11-13
Supplement: s1 [file s1]

**Table S1.** Local climatological data during consecutive growing seasons 2014 to 2019\*.

|                                  | Sep  | Oct  | Nov  | Dec | Jan | Feb | Mar | Apr  | May  | Jun  | Jul  | Aug  |
|----------------------------------|------|------|------|-----|-----|-----|-----|------|------|------|------|------|
| <b>2014/2015</b>                 |      |      |      |     |     |     |     |      |      |      |      |      |
| Maximum temperature (°C)         | 30   | 24   | 8    | 7   | 6   | 1   | 16  | 27   | 28   | 32   | 33   | 32   |
| Minimum temperature (°C)         | -2   | -4   | -29  | -32 | -34 | -30 | -30 | -9   | -4   | 4    | 5    | 2    |
| Average maximum temperature (°C) | 19   | 13   | -6   | -6  | -7  | -11 | 2   | 12   | 18   | 24   | 25   | 24   |
| Average minimum temperature (°C) | 6    | 1    | -13  | -13 | -16 | -22 | -6  | -1   | 2    | 11   | 13   | 11   |
| Maximum soil temperature (°C)    | 16   | 11   | 3    | -1  | -1  | -8  | 3   | 9    | 17   | 21   | 23   | 20   |
| Minimum soil temperature (°C)    | 8    | 2    | -10  | -13 | -19 | -15 | -12 | 0    | 6    | 12   | 17   | 12   |
| Average soil temperature (°C)    | 12   | 8    | -3   | -4  | -7  | -10 | 0   | 5    | 11   | 18   | 20   | 17   |
| Precipitation (mm)               | 13.0 | 15.2 | 14.2 | 0.0 | 1.0 | 0.3 | 1.0 | 19.6 | 8.9  | 33.5 | 37.1 | 68.6 |
| <b>2015/2016</b>                 |      |      |      |     |     |     |     |      |      |      |      |      |
| Maximum temperature (°C)         | 27   | 26   | 10   | 6   | 4   | 5   | 11  | 25   | 33   | 30   | 29   | 29   |
| Minimum temperature (°C)         | -5   | -5   | -24  | -27 | -31 | -24 | -17 | -7   | -2   | 5    | 8    | 3    |
| Average maximum temperature (°C) | 18   | 13   | 1    | -5  | -8  | -3  | 2   | 12   | 22   | 24   | 24   | 23   |
| Average minimum temperature (°C) | 6    | 1    | -6   | -13 | -12 | -12 | -6  | -1   | 6    | 11   | 12   | 11   |
| Maximum soil temperature (°C)    | 16   | 11   | 7    | 3   | -2  | -2  | 2   | 8    | 16   | 22   | 22   | 20   |
| Minimum soil temperature (°C)    | 6    | 3    | -2   | -6  | -7  | -7  | -6  | 0    | 5    | 15   | 17   | 15   |
| Average soil temperature (°C)    | 11   | 6    | 2    | -3  | -4  | -4  | 0   | 4    | 12   | 18   | 19   | 18   |
| Precipitation (mm)               | 45.5 | 32.0 | 11.7 | 0.3 | 1.0 | 2.0 | 2.3 | 2.0  | 39.4 | 50.0 | 55.4 | 51.6 |
| <b>2016/2017</b>                 |      |      |      |     |     |     |     |      |      |      |      |      |
| Maximum temperature (°C)         | 29   | 17   | 20   | 2   | 6   | 8   | 12  | 21   | 30   | 33   | 30   | 27   |
| Minimum temperature (°C)         | -2   | -3   | -10  | -30 | -35 | -31 | -26 | -9   | -3   | 4    | 6    | 6    |
| Average maximum temperature (°C) | 19   | 6    | 7    | -9  | -7  | -5  | -1  | 10   | 19   | 22   | 26   | 25   |
| Average minimum temperature (°C) | 5    | -1   | -2   | -18 | -17 | -13 | -10 | -2   | 5    | 10   | 12   | 10   |
| Maximum soil temperature (°C)    | 18   | 12   | 6    | -1  | -3  | -1  | 3   | 6    | 18   | 22   | 23   | 20   |
| Minimum soil temperature (°C)    | 9    | 2    | -1   | -12 | -7  | -6  | -6  | 0    | 6    | 11   | 18   | 15   |
| Average soil temperature (°C)    | 12   | 2    | 1    | -7  | -5  | -3  | -2  | 2    | 10   | 15   | 21   | 18   |
| Precipitation (mm)               | 26.4 | 30.7 | 8.6  | 0.0 | 1.8 | 0.0 | 1.0 | 15.7 | 55.9 | 45.7 | 24.6 | 14.7 |
| <b>2018/2019</b>                 |      |      |      |     |     |     |     |      |      |      |      |      |
| Maximum temperature (°C)         | 23   | 21   | 4    | 5   | 4   | -11 | 14  | 22   | 31   | 34   | 29   | 34   |
| Minimum temperature (°C)         | -9   | -10  | -23  | -30 | -31 | -39 | -34 | -10  | -10  | 4    | 6    | 3    |
| Average maximum temperature (°C) | 12   | 9    | -4   | -5  | -8  | -22 | 7   | 12   | 17   | 22   | 24   | 24   |
| Average minimum temperature (°C) | 3    | -4   | -10  | -14 | -19 | -31 | -17 | -3   | 1    | 9    | 12   | 10   |
| Maximum soil temperature (°C)    | 15   | 5    | 3    | -2  | -3  | —   | —   | 10   | 18   | 19   | 22   | —    |
| Minimum soil temperature (°C)    | 3    | 1    | -2   | -6  | -9  | —   | —   | 0    | 4    | 12   | 15   | —    |
| Average soil temperature (°C)    | 9    | 4    | -1   | -3  | -7  | —   | —   | 4    | 11   | 15   | 18   | —    |
| Precipitation (mm)               | 31.0 | 6.4  | 4.8  | 0.3 | 2.3 | 0.0 | 4.6 | 2.3  | 7.6  | 63.2 | 67.8 | 3.8  |

\*Data from [www.weatherlink.com](http://www.weatherlink.com).
