# Supplementary material for: The Relationships between Plant Developmental Traits and Winter Field Survival in Rye (Secale cereale L.)
Source: MDPI journal article supplement (doi:10.3390/plants10112455), 2021-11-13
Supplement: s1 [file s1]

**Table S2.** Development trait data for different growth habit classes of rye.

|                              | <b>Growth</b> | <b>WFS</b>   | <b>FLN</b> | <b>PGH</b> | <b>DTA</b> | <b>PHT</b> | <b>TIL</b> | <b>FLA</b>      |
|------------------------------|---------------|--------------|------------|------------|------------|------------|------------|-----------------|
| <b>Genotype<sup>1/</sup></b> | <b>habit</b>  | <b>class</b> | Leaves     | Score      | Days       | cm         | cm         | cm <sup>2</sup> |
| 1-Leth Coulee Rye            | Winter        | 1            | 11.9       | 1.4        | 32.3       | 135.6      | 34.6       | 24.1            |
| 2-Gauthier                   | Winter        | 1            | 11.4       | 2.4        | 31.5       | 116.6      | 32.5       | 8.2             |
| 3-AC Remington               | Winter        | 1            | 12.0       | 3.0        | 35.0       | 106.5      | 35.9       | 19.9            |
| 4-AC Rifle                   | Winter        | 1            | 12.3       | 2.8        | 36.7       | 113.4      | 33.5       | 12.6            |
| 5-Musketeer                  | Winter        | 1            | 12.4       | 2.5        | 35.1       | 124.7      | 37.8       | 22.3            |
| 6-SM 38R                     | Winter        | 1            | 11.9       | 2.1        | 30.7       | 126.6      | 35.4       | 24.1            |
| 7-Prima                      | Winter        | 1            | 11.8       | 2.5        | 36.2       | 128.8      | 36.5       | 18.5            |
| 8-Saratovskaja 4             | Winter        | 1            | 10.5       | 2.8        | 33.0       | 129.9      | 41.5       | 22.9            |
| 9-SM 4R                      | Winter        | 1            | 10.7       | 2.5        | 36.9       | 122.5      | 36.0       | 16.4            |
| 10-Pearl                     | Winter        | 1            | 10.8       | 2.5        | 31.4       | 133.5      | 42.8       | 25.4            |
| 11-Kustro                    | Winter        | 1            | 10.3       | 2.5        | 38.6       | 130.1      | 37.1       | 15.9            |
| 12-Kharkivska 95             | Winter        | 1            | 11.2       | 2.5        | 39.6       | 104.4      | 35.1       | 26.3            |
| 13-Kharkivska 98             | Winter        | 1            | 11.5       | 2.5        | 33.0       | 120.5      | 40.0       | 21.3            |
| 14-Esprit                    | Winter        | 1            | 10.6       | 2.1        | 32.7       | 97.3       | 23.5       | 8.3             |
| 15-Ponsi                     | Winter        | 1            | 11.7       | 2.0        | 33.9       | 135.0      | 45.1       | 20.5            |
| 16-Hazlet                    | Winter        | 1            | 10.5       | 2.8        | 36.8       | 113.8      | 34.5       | 16.5            |
| 17-Antelope                  | Winter        | 1            | 9.2        | 2.8        | 31.6       | 124.7      | 44.4       | 15.6            |
| 18-Emerald                   | Winter        | 1            | 10.8       | 2.1        | 30.2       | 125.0      | 36.5       | 16.8            |
| 19-Anna                      | Winter        | 1            | 11.8       | 2.0        | 24.4       | 137.3      | 42.4       | 16.3            |
| 20-R003-4                    | Winter        | 2            | 9.8        | 2.0        | 31.2       | 123.3      | 38.5       | 10.2            |
| 21-Voima                     | Winter        | 2            | 10.1       | 2.3        | 41.2       | 137.8      | 34.3       | 20.9            |
| 22-Dakota                    | Winter        | 2            | 11.3       | 2.0        | 33.7       | 126.1      | 34.0       | 8.1             |
| 23-Sc-73                     | Winter        | 2            | 10.8       | 2.7        | 27.2       | 124.0      | 35.8       | 10.9            |
| 24-Animo                     | Winter        | 2            | 8.0        | 3.0        | 40.0       | 121.0      | 34.9       | 21.5            |
| 25-Caribou                   | Winter        | 2            | 10.9       | 3.0        | 41.1       | 125.5      | 44.7       | 9.9             |
| 26-Puma                      | Winter        | 2            | 10.8       | 2.8        | 27.7       | 134.3      | 37.0       | 20.0            |
| 27-Othello                   | Winter        | 2            | 11.2       | 2.3        | 36.4       | 127.7      | 42.2       | 16.4            |
| 28-Rymin                     | Winter        | 2            | 9.7        | 3.1        | 33.7       | 118.9      | 32.4       | 10.9            |
| 29-Adams                     | Winter        | 2            | 11.2       | 2.1        | 22.2       | 124.5      | 34.8       | 8.6             |
| 30-Sangaste                  | Winter        | 2            | 10.8       | 2.1        | 25.8       | 136.4      | 45.5       | 20.4            |
| 31-Visa                      | Winter        | 2            | 9.6        | 2.8        | 36.0       | 132.2      | 41.3       | 15.7            |
| 32-Vitallo                   | Winter        | 2            | 11.3       | 1.8        | 35.0       | 131.4      | 41.4       | 23.4            |
| 33-Halo                      | Winter        | 2            | 10.7       | 2.0        | 20.8       | 122.1      | 28.9       | 21.4            |
| 35-Frontier                  | Winter        | 2            | 8.8        | 1.8        | 32.2       | 126.8      | 43.4       | 21.0            |
| 36-Enzi                      | Winter        | 2            | 10.6       | 2.1        | 33.8       | 133.9      | 35.8       | 16.1            |
| 38-Motto                     | Winter        | 2            | 9.8        | 2.3        | 38.8       | 122.9      | 37.4       | 15.6            |
| 39-Dankowskie Selekcyjne     | Winter        | 2            | 10.7       | 2.3        | 30.7       | 125.2      | 45.4       | 13.7            |
| 40-Galma                     | Winter        | 3            | 7.8        | 2.1        | 33.8       | 113.0      | 36.5       | 10.0            |
| 41-Cougar                    | Winter        | 3            | 10.6       | 2.3        | 20.1       | 119.9      | 34.9       | 16.1            |
| 42-Dominant                  | Winter        | 3            | 10.1       | 2.0        | 27.7       | 131.2      | 41.0       | 10.4            |
| 43-Dankowskie Nowe           | Winter        | 3            | 11.2       | 2.3        | 39.0       | 134.1      | 38.5       | 21.1            |
| 44-Danko                     | Winter        | 3            | 9.8        | 2.1        | 31.5       | 113.7      | 38.8       | 18.6            |
| 46-Dankowskie Srebrne        | Winter        | 3            | 10.0       | 2.3        | 31.9       | 135.9      | 43.0       | 24.2            |
| 47-Carolkurz                 | Winter        | 3            | 10.1       | 2.5        | 33.3       | 119.6      | 33.0       | 21.1            |
| 48-Horton                    | Winter        | 3            | 9.9        | 2.3        | 26.7       | 141.6      | 38.5       | 16.7            |
| 49-Kodiak                    | Winter        | 3            | 11.8       | 1.8        | 32.6       | 133.0      | 34.4       | 15.2            |
| 50-GC-100                    | Winter        | 3            | 8.4        | 2.0        | 43.1       | 127.3      | 36.1       | 24.7            |
| 51-Amilo                     | Winter        | 3            | 8.4        | 2.1        | 35.7       | 116.6      | 37.3       | 22.6            |
| 52-Sellino                   | Winter        | 3            | 8.7        | 2.0        | 31.3       | 123.1      | 34.5       | 18.0            |
| 54-Protector                 | Winter        | 3            | 8.2        | 2.3        | 32.9       | 139.1      | 39.4       | 8.0             |
| 55-Toivo                     | Winter        | 3            | 9.1        | 1.5        | 22.2       | 141.5      | 36.8       | 18.5            |

**Table S2** cont.

|                           |             |      |      |      |       |       |      |      |
|---------------------------|-------------|------|------|------|-------|-------|------|------|
| 56-Culpan                 | Winter      | 3    | 9.6  | 2.4  | 24.3  | 115.0 | 27.5 | 25.3 |
| 57-Hardy white spring Rye | Winter      | 3    | 9.4  | 2.1  | 35.3  | 119.0 | 32.8 | 19.0 |
| 59-Stoir                  | Winter      | 4    | 8.7  | 2.3  | 32.9  | 131.9 | 30.0 | 14.8 |
| 60-Vaschod                | Winter      | 4    | 9.3  | 2.1  | 33.8  | 119.6 | 36.0 | 22.6 |
| 64-Carsten                | Winter      | 4    | 8.6  | 2.0  | 33.7  | 134.1 | 37.4 | 24.4 |
| 67-Danae                  | Winter      | 4    | 8.0  | 1.4  | 25.0  | 118.0 | 29.6 | 11.5 |
| 68-Clse 35                | Winter      | 4    | 9.4  | 1.1  | 21.2  | 129.6 | 42.4 | 11.5 |
| 71-L-286-R                | Winter      | 4    | 8.8  | 2.1  | 41.8  | 85.4  | 19.1 | 14.1 |
| 73-Syn 20-L               | Winter      | 4    | 8.3  | 2.4  | 34.0  | 87.6  | 23.9 | 13.0 |
| 75-Dakold                 | Winter      | 4    | 8.4  | 1.3  | 24.8  | 123.5 | 38.8 | 13.4 |
| 76-Wheeler                | Winter      | 4    | 9.2  | 2.1  | 33.3  | 119.7 | 36.7 | 12.0 |
| 77-M.Karlic CT2           | Winter      | 4    | 7.9  | 1.4  | 48.8  | 78.3  | 30.0 | 21.7 |
| 79-Petkus Kurzstroh       | Winter      | 5    | 7.7  | 1.4  | 19.8  | 118.8 | 44.8 | 15.9 |
| 81-Petkus                 | Winter      | 5    | 8.0  | 1.3  | 25.3  | 121.2 | 42.9 | 13.2 |
| 85-Somro                  | Winter      | 5    | 8.3  | 2.1  | 21.7  | 111.8 | 31.7 | 15.7 |
| 87-Baltia                 | Winter      | 5    | 7.8  | 1.4  | 21.2  | 130.9 | 46.5 | 9.0  |
| 90-Ottawa Select          | Winter      | 5    | 7.9  | 1.4  | 24.8  | 121.1 | 37.5 | 18.8 |
| 91-Gulzow Kunz CT1        | Winter      | 5    | 8.7  | 1.4  | 31.2  | 67.2  | 10.5 | 15.2 |
| 94-L-145-N                | Winter      | 5    | 8.2  | 1.7  | 42.8  | 91.7  | 20.7 | 15.7 |
| 95-L-145-P                | Winter      | 5    | 8.5  | 1.7  | 35    | 94.6  | 22.8 | 14.4 |
| 96-L-18-R                 | Winter      | 5    | 7.7  | 2.1  | 35    | 81.5  | 19.8 | 14.9 |
| Average:                  |             | 9.9  | 2.1  | 32.1 | 121.0 | 35.8  | 16.9 |      |
| Min:                      |             | 7.7  | 1.1  | 19.8 | 67.2  | 10.5  | 8.0  |      |
| Max:                      |             | 12.4 | 3.1  | 48.8 | 141.6 | 46.5  | 26.3 |      |
|                           |             |      |      |      |       |       |      |      |
| 34-Balbo                  | Facultative | 2    | 10.0 | 2.0  | 26.4  | 140.5 | 43.9 | 20.6 |
| 37-Explorer               | Facultative | 2    | 9.7  | 1.7  | 29.0  | 130.5 | 38.7 | 9.0  |
| 58-Maton                  | Facultative | 3    | 8.2  | 1.3  | 41.2  | 120.3 | 25.0 | 14.2 |
| 63-Oklon                  | Facultative | 4    | 8.2  | 2.3  | 23.7  | 134.0 | 36.5 | 15.0 |
| 69-Gator                  | Facultative | 4    | 8.4  | 1.8  | 17.2  | 125.4 | 38.4 | 15.4 |
| 70-Elbon                  | Facultative | 4    | 8.7  | 2.1  | 27.8  | 105.0 | 24.8 | 23.5 |
| 78-Wintergrazer 70        | Facultative | 5    | 8.2  | 1.4  | 26.2  | 144.4 | 34.8 | 10.7 |
| 83-Wren Abruzzi           | Facultative | 5    | 8.0  | 1.3  | 22.3  | 130.2 | 37.4 | 15.6 |
| Average:                  |             | 8.7  | 1.7  | 26.7 | 128.8 | 34.9  | 15.5 |      |
| Min:                      |             | 8.0  | 1.3  | 17.2 | 105.0 | 24.8  | 9.0  |      |
| Max:                      |             | 10.0 | 2.3  | 41.2 | 144.4 | 43.9  | 23.5 |      |
|                           |             |      |      |      |       |       |      |      |
| 66-Harach                 | Spring      | 4    | 8.6  | 2.1  | 25.7  | 120.9 | 42.7 | 16.3 |
| 74-SR4A-S5                | Spring      | 4    | 8.0  | 2.1  | 33.2  | 86.3  | 25.4 | 20.2 |
| 80-Gazelle                | Spring      | 5    | 8.8  | 1.7  | 25.0  | 120.6 | 42.7 | 17.4 |
| 82-Prolfic Spring         | Spring      | 5    | 8.3  | 1.8  | 24.4  | 128.9 | 40.4 | 17.4 |
| 84-Extra Early Rye1       | Spring      | 5    | 8.3  | 1.1  | 15.3  | 114.6 | 32.8 | 15.5 |
| 89-F1-Synt                | Spring      | 5    | 8.5  | 1.7  | 21.7  | 130.6 | 33.7 | 24.3 |
| 92-Rogo                   | Spring      | 5    | 8.8  | 1.1  | 20.5  | 122.6 | 35.5 | 22.1 |
| 93-Florida 401            | Spring      | 5    | 8.0  | 1.0  | 16.1  | 130.3 | 39.3 | 13.1 |
| Average:                  |             | 8.4  | 1.6  | 22.7 | 119.4 | 36.6  | 18.3 |      |
| Min:                      |             | 8.0  | 1.0  | 15.3 | 86.3  | 25.4  | 13.1 |      |
| Max:                      |             | 8.8  | 2.1  | 33.2 | 130.6 | 42.7  | 24.3 |      |
|                           |             |      |      |      |       |       |      |      |
| 45-ACE-1                  | Perennial   | 3    | 11.4 | 1.7  | 40.0  | 129.5 | 36.5 | 13.2 |
| 53-R538                   | Perennial   | 3    | 8.3  | 2.4  | 36.7  | 113.4 | 35.5 | 25.7 |
| 61-R550                   | Perennial   | 4    | 8.0  | 2.7  | 34.8  | 123.4 | 26.5 | 14.5 |
| 62-Reimann Philipp        | Perennial   | 4    | 9.6  | 2.1  | 34.2  | 113.9 | 30.4 | 14.2 |
| 65-R903                   | Perennial   | 4    | 8.3  | 2.1  | 40.2  | 120.6 | 27.6 | 22.4 |

**Table S2 cont.**

|                  |           |      |      |      |       |       |      |      |
|------------------|-----------|------|------|------|-------|-------|------|------|
| 72-R904          | Perennial | 4    | 8.0  | 2.1  | 34.8  | 127.4 | 28.8 | 15.5 |
| 86-R1210         | Perennial | 5    | 8.5  | 2.0  | 43.3  | 113.4 | 35.5 | 10.0 |
| 88-R797          | Perennial | 5    | 8.3  | 2.1  | 43.7  | 115.2 | 35.7 | 15.9 |
| Average:         |           | 8.8  | 2.1  | 38.5 | 119.6 | 32.1  | 16.4 |      |
| Min:             |           | 8.0  | 1.7  | 34.2 | 113.4 | 26.5  | 10.0 |      |
| Max:             |           | 11.4 | 2.7  | 43.7 | 129.5 | 36.5  | 25.7 |      |
| Overall average: |           |      | 9.6  | 2.1  | 31.4  | 121.4 | 35.5 | 16.9 |
| Overall min:     |           |      | 7.7  | 1.0  | 15.3  | 67.2  | 10.5 | 8.0  |
| Overall max:     |           |      | 12.4 | 3.1  | 48.8  | 144.4 | 46.5 | 26.3 |

<sup>1/</sup> Genotype number refers to number in PCA bi-plot (Fig. 3).
