# Supplementary material for: The Relationships between Plant Developmental Traits and Winter Field Survival in Rye (Secale cereale L.)
Source: MDPI journal article supplement (doi:10.3390/plants10112455), 2021-11-13
Supplement: s1 [file s1]

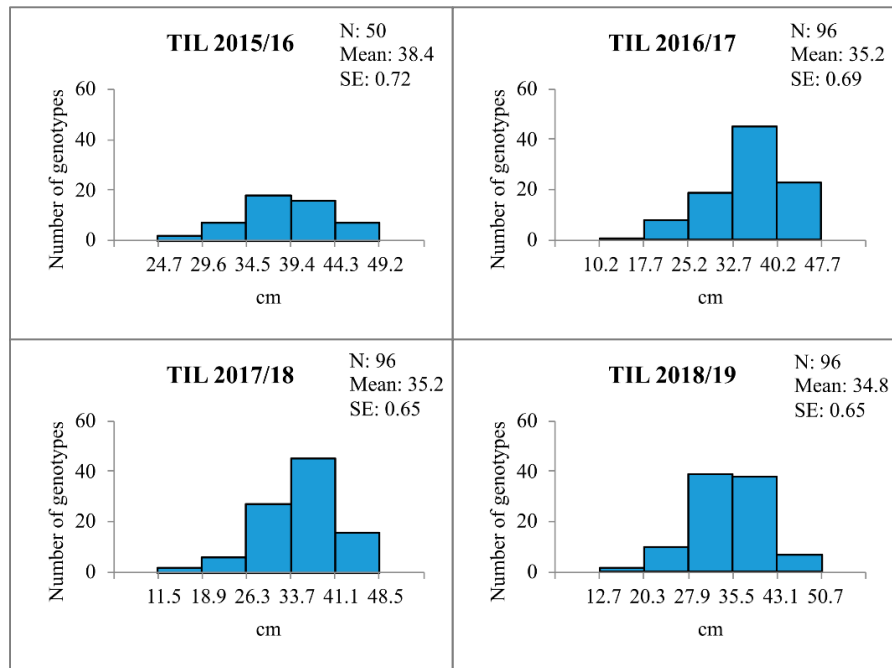

| Correlations between TIL values determined in different trials. |           |           |           |           |          |
|-----------------------------------------------------------------|-----------|-----------|-----------|-----------|----------|
| Trait trial                                                     | TIL 15/16 | TIL 16/17 | TIL 17/18 | TIL 18/19 | TIL BLUE |
| TIL 15/16                                                       | 1.00      |           |           |           |          |
| TIL 16/17                                                       | 0.54***   | 1.00      |           |           |          |
| TIL 17/18                                                       | 0.24      | 0.77***   | 1.00      |           |          |
| TIL 18/19                                                       | 0.58***   | 0.78***   | 0.78***   | 1.00      |          |
| TIL BLUE                                                        | 0.89***   | 0.97***   | 0.77***   | 0.79***   | 1.00     |

Pearson correlation coefficient determined at \*\*\*  $p < 0.001$ .

**Figure S6.** Frequency distribution and correlation analysis TIL data obtained for rye population in four studies.
