# Supplementary material for: The Relationships between Plant Developmental Traits and Winter Field Survival in Rye (Secale cereale L.)
Source: MDPI journal article supplement (doi:10.3390/plants10112455), 2021-11-13
Supplement: s1 [file s1]

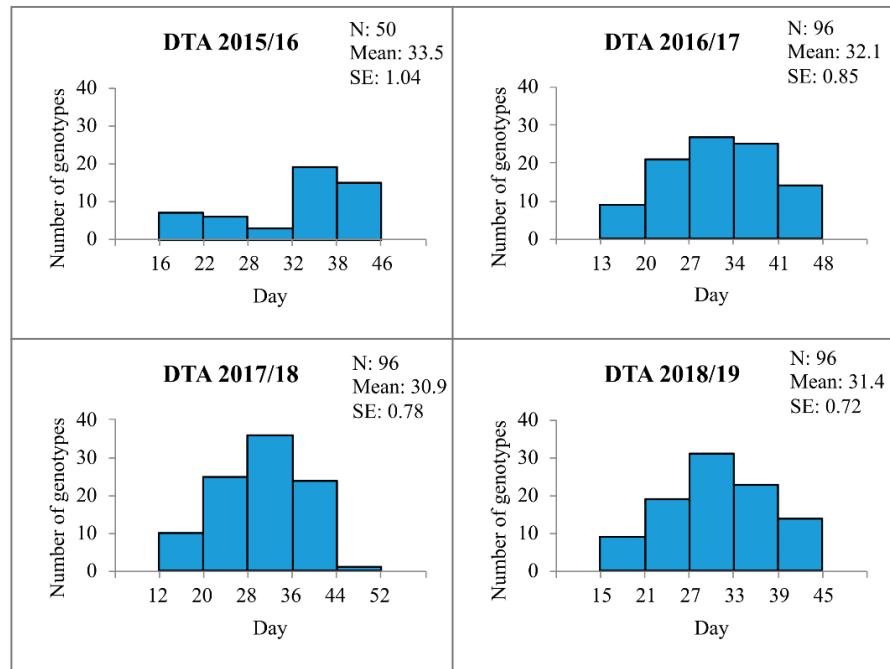

| Correlations between DTA values determined in different trials. |           |           |           |           |          |
|-----------------------------------------------------------------|-----------|-----------|-----------|-----------|----------|
| Trait trial                                                     | DTA_15/16 | DTA_16/17 | DTA_17/18 | DTA_18/19 | DTA_BLUE |
| DTA_15/16                                                       | 1.00      |           |           |           |          |
| DTA_16/17                                                       | 0.92***   | 1.00      |           |           |          |
| DTA_17/18                                                       | 0.70***   | 0.77***   | 1.00      |           |          |
| DTA_18/19                                                       | 0.95***   | 0.92***   | 0.85***   | 1.00      |          |
| DTA_BLUE                                                        | 0.95***   | 0.89***   | 0.92***   | 0.96***   | 1.00     |

Pearson correlation coefficient determined at \*\*\*  $p < 0.001$ .

**Figure S4.** Frequency distribution and correlation analysis for days to DTA data obtained for rye population in four studies.
