# Supplementary material for: The Relationships between Plant Developmental Traits and Winter Field Survival in Rye (Secale cereale L.)
Source: MDPI journal article supplement (doi:10.3390/plants10112455), 2021-11-13
Supplement: s1 [file s1]

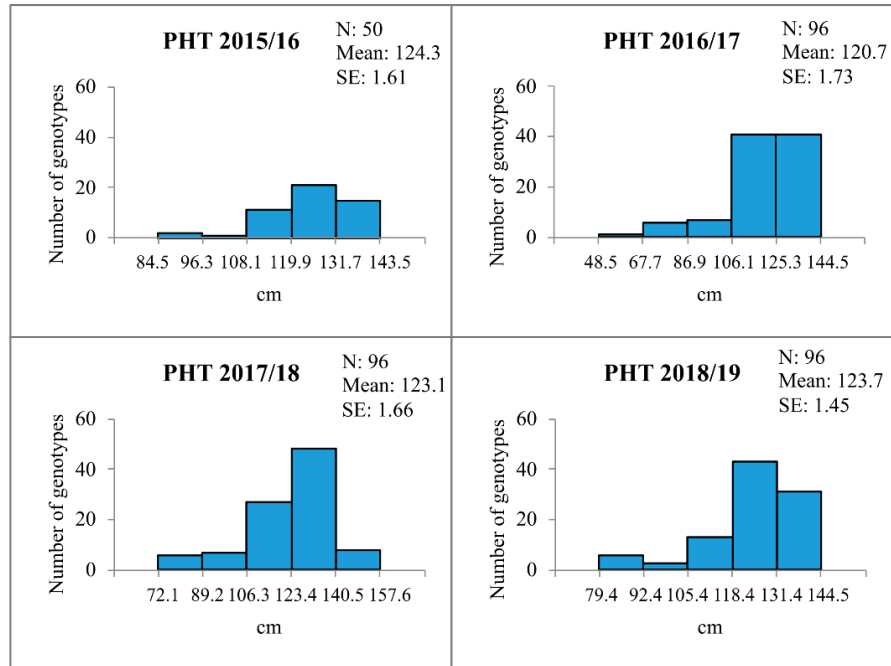

| Correlations between PHT values determined in different trials. |           |           |           |           |          |
|-----------------------------------------------------------------|-----------|-----------|-----------|-----------|----------|
| Trait trial                                                     | PHT 15/16 | PHT 16/17 | PHT 17/18 | PHT 18/19 | PHT BLUE |
| PHT_15/16                                                       | 1.00      |           |           |           |          |
| PHT_16/17                                                       | 0.74***   | 1.00      |           |           |          |
| PHT_17/18                                                       | 0.18      | 0.68***   | 1.00      |           |          |
| PHT_18/19                                                       | 0.59***   | 0.81***   | 0.82***   | 1.00      |          |
| PHT_BLUE                                                        | 0.80***   | 0.91***   | 0.88***   | 0.94***   | 1.00     |

Pearson correlation coefficient determined at \*\*\*  $p < 0.001$ .

**Figure S5.** Frequency distribution and correlation analysis for PHT data obtained for rye population in four studies.
