# Supplementary material for: The Relationships between Plant Developmental Traits and Winter Field Survival in Rye (Secale cereale L.)
Source: MDPI journal article supplement (doi:10.3390/plants10112455), 2021-11-13
Supplement: s1 [file s1]

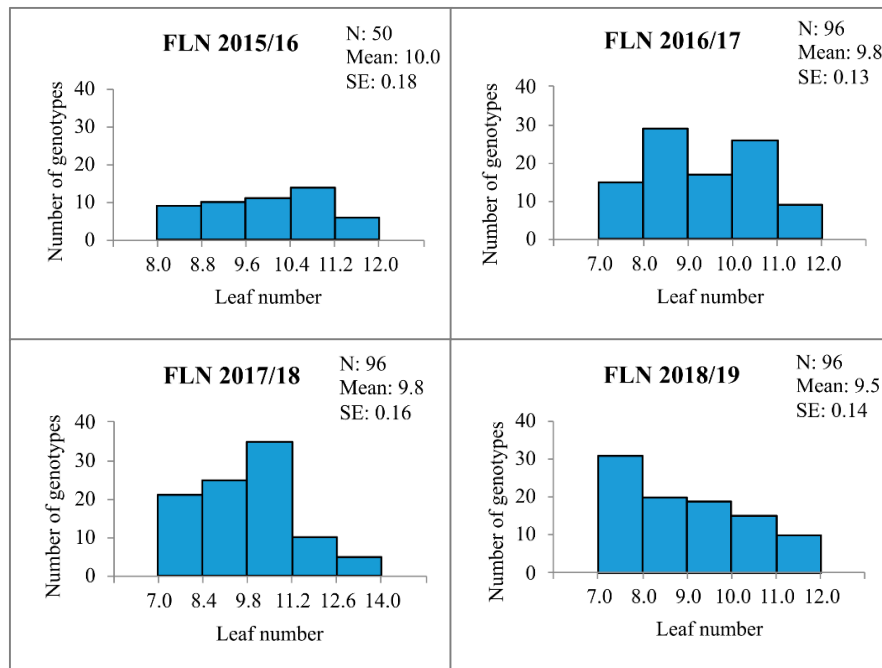

| Correlations between FLN values determined in different trials |           |           |           |           |          |
|----------------------------------------------------------------|-----------|-----------|-----------|-----------|----------|
| Trait trial                                                    | FLN 15/16 | FLN 16/17 | FLN 17/18 | FLN 18/19 | FLN BLUE |
| FLN_15/16                                                      | 1.00      |           |           |           |          |
| FLN_16/17                                                      | 0.82***   | 1.00      |           |           |          |
| FLN_17/18                                                      | 0.71***   | 0.85***   | 1.00      |           |          |
| FLN_18/19                                                      | 0.67***   | 0.79***   | 0.88***   | 1.00      |          |
| FLN BLUE                                                       | 0.86***   | 0.91***   | 0.95***   | 0.93***   | 1.00     |

Pearson correlation coefficient determined at \*\*\*  $p < 0.001$ .

**Figure S2.** Frequency distribution and correlation analysis for FLN data obtained for rye population in four studies.
